# Supplementary material
Source: Springer Nature journal article supplement (https://www.springermedizin.de/resource/supplementary/12865_2003_42_MOESM4_ESM.pdf/9428434)

**A. Heart Tissue** FVB

VWF-lacZ

Tie2-lacZ

Not  
Immunized

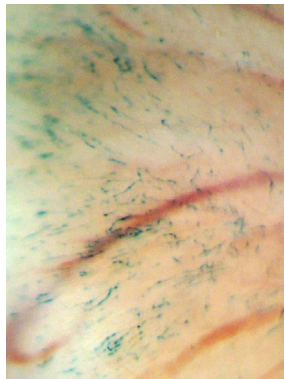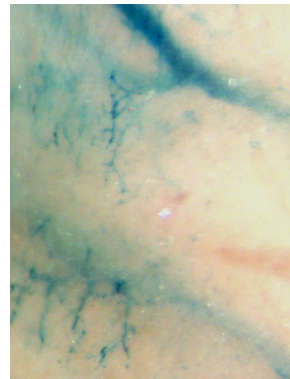

Immunized

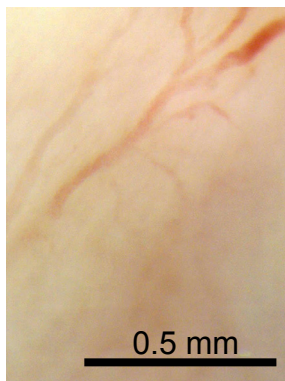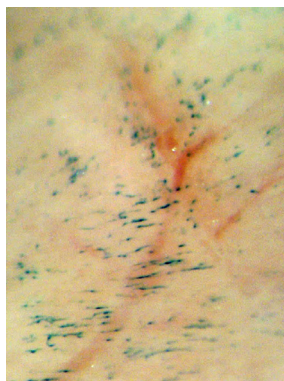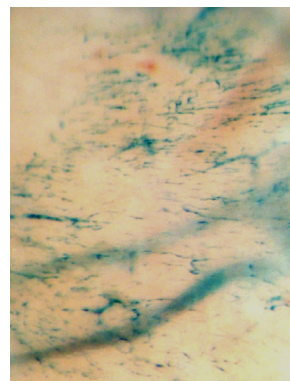

**B. Skin tissue, Immunized mice**

FVB

VWF-lacZ

Tie2-lacZ

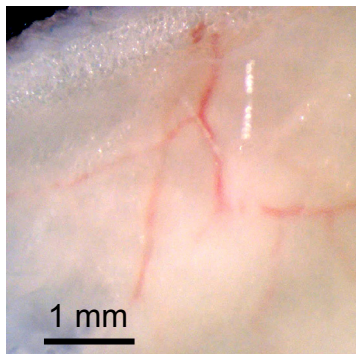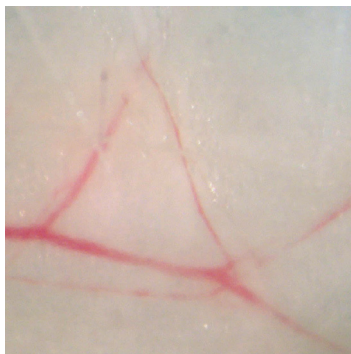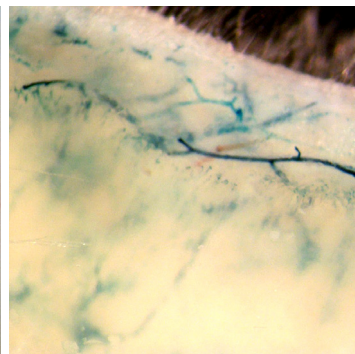

Supplement: MOESM4 [file 9428434]
